# Supplementary material for: Metagenomic Data Utilization and Analysis (MEDUSA) and Construction of a Global Gut Microbial Gene Catalogue
Source: PLoS Comput Biol. 2014 Jul 10;10(7):e1003706. doi: 10.1371/journal.pcbi.1003706 (PMC4091689; doi:10.1371/journal.pcbi.1003706)
Supplement: Table S3 — Pearson correlation between MEDUSA and Metaphlan genus abundance. (XLSX) [file pcbi.1003706.s014.xlsx]

## Sheet: ST3. Metaphlan comparison
Sample	Pearson correlation between MEDUSA and Metaphlan genus abundance
SRS043001	0.99496
SRS011529	0.87086
SRS048164	0.994272
SRS011452	0.997423
SRS019787	0.986551
SRS019030	0.986842
SRS016018	0.820738
SRS047014	0.980848
SRS019601	0.96436
SRS015960	0.975585
SRS023914	0.809912
SRS015217	0.875317
SRS049959	0.847271
SRS013951	0.887847
SRS056519	0.995613
SRS052697	0.96853
SRS014459	0.874743
SRS016267	0.98772
SRS019582	0.862532
SRS014683	0.940002
SRS050925	0.933844
SRS015794	0.880003
SRS022071	0.914506
SRS054590	0.984369
SRS051031	0.99022
SRS013476	0.800533
SRS016954	0.990456
SRS011302	0.907507
SRS024075	0.9931
SRS049995	0.983589
SRS017433	0.968165
SRS047044	0.986594
SRS019161	0.967703
SRS045645	0.976004
SRS015854	0.975408
SRS013215	0.999094
SRS022609	0.941536
SRS011239	0.904129
SRS014313	0.969018
SRS023583	0.971303
SRS058723	0.991985
SRS016753	0.986826
SRS020233	0.955288
SRS015133	0.893131
SRS016095	0.963989
SRS024388	0.99977
SRS019685	0.977461
SRS063985	0.991971
SRS024132	0.756813
SRS015663	0.978556
SRS016203	0.974596
SRS015782	0.925932
SRS018817	0.994458
SRS017247	0.998246
SRS015264	0.979847
SRS065504	0.955233
SRS015065	0.86834
SRS020869	0.99467
SRS017191	0.996956
SRS014923	0.727128
SRS077730	0.857462
SRS043411	0.972238
SRS021948	0.928201
SRS018575	0.997863
SRS014613	0.969404
SRS017103	0.940814
SRS057717	0.992056
SRS045004	0.959992
SRS024265	0.991316
SRS023346	0.996104
SRS024009	0.985565
SRS052027	0.993508
SRS019397	0.988485
SRS016585	0.999759
SRS017821	0.994384
SRS042284	0.994769
SRS018656	0.832911
SRS062427	0.990198
SRS050299	0.981663
SRS050752	0.808751
SRS054956	0.988888
SRS048870	0.933165
SRS023526	0.824524
SRS049712	0.99329
SRS014287	0.914897
SRS013158	0.999332
SRS015578	0.979623
SRS051882	0.973722
SRS012273	0.898888
SRS012902	0.999939
SRS024625	0.99417
SRS024549	0.974237
SRS018133	0.889099
SRS058770	0.875092
SRS019267	0.994246
SRS024435	0.924611
SRS049900	0.997196
SRS045713	0.928645
SRS015190	0.995999
SRS064276	0.768746
SRS019968	0.924214
SRS043701	0.981804
SRS017521	0.951398
SRS016989	0.998357
SRS016335	0.984942
SRS023971	0.99441
SRS050422	0.795683
SRS064557	0.997063
SRS053398	0.903996
SRS021484	0.928906
SRS020328	0.847499
SRS014979	0.819307
SRS013800	0.981801
SRS011586	0.88844
SRS017701	0.982304
SRS014235	0.943418
SRS013521	0.966904
SRS078176	0.95539
SRS019910	0.993886
SRS018427	0.96286
SRS011061	0.995486
SRS024331	0.981715
SRS011405	0.996641
SRS011271	0.942554
SRS055982	0.96969
SRS022137	0.976968
SRS053335	0.960374
SRS017307	0.9593
SRS018351	0.982614
SRS015369	0.999516
SRS016495	0.734751
SRS042628	0.907259
SRS013687	0.795671
SRS016056	0.999625
SRS063040	0.965967
SRS064645	0.994784
SRS056259	0.98981
