# Supplementary material for: Metagenomic Data Utilization and Analysis (MEDUSA) and Construction of a Global Gut Microbial Gene Catalogue
Source: PLoS Comput Biol. 2014 Jul 10;10(7):e1003706. doi: 10.1371/journal.pcbi.1003706 (PMC4091689; doi:10.1371/journal.pcbi.1003706)
Supplement: Table S4 — Identified core species in 50% and 90% of the individuals. (XLSX) [file pcbi.1003706.s015.xlsx]

## Sheet: ST4. Core species
Core50% Species		Core90% Species
Alistipes putredinis DSM 17216		Alistipes putredinis DSM 17216
Alistipes shahii WAL 8301		Alistipes shahii WAL 8301
Alistipes sp.HGB5		Alistipes sp.HGB5
Anaerostipes caccae DSM 14662		Anaerotruncus colihominis DSM 17241
Anaerotruncus colihominis DSM 17241		Bacteroides caccae ATCC 43185
Bacteroides caccae ATCC 43185		Bacteroides coprocola DSM 17136
Bacteroides clarus YIT 12056		Bacteroides coprophilus DSM 18228. JCM 13818
Bacteroides coprocola DSM 17136		Bacteroides eggerthii 1_2_48FAA
Bacteroides coprophilus DSM 18228. JCM 13818		Bacteroides finegoldii DSM 17565
Bacteroides eggerthii 1_2_48FAA		Bacteroides fluxus YIT 12057
Bacteroides finegoldii DSM 17565		Bacteroides fragilis 3_1_12
Bacteroides fluxus YIT 12057		Bacteroides intestinalis DSM 17393
Bacteroides fragilis 3_1_12		Bacteroides pectinophilus ATCC 43243
Bacteroides helcogenes P 36 108		Bacteroides plebeius DSM 17135
Bacteroides intestinalis DSM 17393		Bacteroides salanitronis DSM 18170
Bacteroides pectinophilus ATCC 43243		Bacteroides sp.1_1_30
Bacteroides plebeius DSM 17135		Bacteroides sp.1_1_6
Bacteroides salanitronis DSM 18170		Bacteroides sp.2_1_56FAA
Bacteroides sp.1_1_30		Bacteroides sp.2_2_4
Bacteroides sp.1_1_6		Bacteroides sp.9_1_42FAA
Bacteroides sp.2_1_56FAA		Bacteroides stercoris ATCC 43183
Bacteroides sp.2_2_4		Bacteroides uniformis ATCC 8492
Bacteroides sp.9_1_42FAA		Blautia hansenii DSM 20583
Bacteroides stercoris ATCC 43183		butyrate producing bacterium SS3 4
Bacteroides uniformis ATCC 8492		Capnocytophaga sp.oral taxon 329 str.F0087
Bifidobacterium adolescentis L2 32		Clostridiales bacterium 1_7_47FAA
Bifidobacterium longum subsp.infantis ATCC 15697. JCM 1222		Clostridium bolteae ATCC BAA 613
Bifidobacterium pseudocatenulatum DSM 20438. JCM 1200		Clostridium difficile QCD 63q42
Bilophila wadsworthia 3_1_6		Clostridium sp.HGF2
Blautia hansenii DSM 20583		Clostridium sp.L2 50
Blautia hydrogenotrophica DSM 10507		Clostridium sp.M62 1
butyrate producing bacterium SS3 4		Clostridium sp.SS2 1
Butyrivibrio crossotus DSM 2876		Clostridium symbiosum WAL 14163
Capnocytophaga sp.oral taxon 329 str.F0087		Coprobacillus sp.29_1
Clostridiales bacterium 1_7_47FAA		Coprococcus catus GD 7
Clostridium bartlettii DSM 16795		Coprococcus comes ATCC 27758
Clostridium bolteae ATCC BAA 613		Coprococcus eutactus ATCC 27759
Clostridium difficile QCD 63q42		Dorea formicigenerans ATCC 27755
Clostridium leptum DSM 753		Dorea longicatena DSM 13814
Clostridium methylpentosum DSM 5476		Erysipelotrichaceae bacterium 3_1_53
Clostridium saccharolyticum WM1		Erysipelotrichaceae bacterium 5_2_54FAA
Clostridium scindens ATCC 35704		Eubacterium dolichum DSM 3991
Clostridium sp.D5		Eubacterium eligens ATCC 27750
Clostridium sp.HGF2		Eubacterium hallii DSM 3353
Clostridium sp.L2 50		Eubacterium rectale M104 1
Clostridium sp.M62 1		Eubacterium ventriosum ATCC 27560
Clostridium sp.SS2 1		Faecalibacterium cf.prausnitzii KLE1255
Clostridium symbiosum WAL 14163		Faecalibacterium prausnitzii A2 165
Collinsella aerofaciens ATCC 25986		Faecalibacterium prausnitzii L2 6
Coprobacillus sp.29_1		Faecalibacterium prausnitzii SL3 3
Coprobacillus sp.D7		Holdemania filiformis DSM 12042
Coprococcus catus GD 7		Lachnospiraceae bacterium 1_4_56FAA
Coprococcus comes ATCC 27758		Lachnospiraceae bacterium 3_1_46FAA
Coprococcus eutactus ATCC 27759		Lachnospiraceae bacterium 3_1_57FAA_CT1
Dorea formicigenerans ATCC 27755		Odoribacter splanchnicus DSM 220712
Dorea longicatena DSM 13814		Parabacteroides merdae ATCC 43184
Eggerthella lenta DSM 2243		Parabacteroides sp.20_3
Erysipelotrichaceae bacterium 3_1_53		Phascolarctobacterium succinatutens YIT 12067
Erysipelotrichaceae bacterium 5_2_54FAA		Pseudoflavonifractor capillosus ATCC 29799
Escherichia albertii TW07627		Roseburia hominis A2 183
Escherichia coli TW10509		Roseburia intestinalis XB6B4
Eubacterium biforme DSM 3989		Roseburia inulinivorans DSM 16841
Eubacterium dolichum DSM 3991		Ruminococcaceae bacterium D16
Eubacterium eligens ATCC 27750		Ruminococcus bromii L2 63
Eubacterium hallii DSM 3353		Ruminococcus gnavus ATCC 29149
Eubacterium rectale M104 1		Ruminococcus lactaris ATCC 29176
Eubacterium siraeum 70 3		Ruminococcus obeum A2 162
Eubacterium ventriosum ATCC 27560		Ruminococcus obeum ATCC 29174
Eubacterium.cylindroides T2 87		Ruminococcus sp.5_1_39BFAA
Faecalibacterium cf.prausnitzii KLE1255		Ruminococcus sp.SR1 5
Faecalibacterium prausnitzii A2 165		Ruminococcus torques L2 14
Faecalibacterium prausnitzii L2 6
Faecalibacterium prausnitzii SL3 3
Holdemania filiformis DSM 12042
Lachnospiraceae bacterium 1_4_56FAA
Lachnospiraceae bacterium 2_1_46FAA
Lachnospiraceae bacterium 3_1_46FAA
Lachnospiraceae bacterium 3_1_57FAA_CT1
Lachnospiraceae bacterium 4_1_37FAA
Lachnospiraceae oral taxon 107 str.F0167
Marvinbryantia formatexigens DSM 14469
Megasphaera genomosp.type_1 str.28L
Odoribacter splanchnicus DSM 220712
Oribacterium sp.oral taxon 078 str.F0262
Parabacteroides merdae ATCC 43184
Parabacteroides sp.20_3
Paraprevotella xylaniphila YIT 11841
Parasutterella excrementihominis YIT 11859
Phascolarctobacterium succinatutens YIT 12067
Prevotella bivia JCVIHMP010
Prevotella buccalis ATCC 35310
Prevotella copri DSM 18205
Prevotella denticola CRIS 18C A
Prevotella disiens FB035 09AN
Prevotella marshii DSM 16973
Prevotella multiformis DSM 16608
Prevotella oris C735
Prevotella salivae DSM 15606
Prevotella tannerae ATCC 51259
Pseudoflavonifractor capillosus ATCC 29799
Roseburia hominis A2 183
Roseburia intestinalis XB6B4
Roseburia inulinivorans DSM 16841
Ruminococcaceae bacterium D16
Ruminococcus bromii L2 63
Ruminococcus champanellensis 18P13
Ruminococcus gnavus ATCC 29149
Ruminococcus lactaris ATCC 29176
Ruminococcus obeum A2 162
Ruminococcus obeum ATCC 29174
Ruminococcus sp.5_1_39BFAA
Ruminococcus sp.SR1 5
Ruminococcus torques L2 14
Streptococcus salivarius CCHSS3
Subdoligranulum variabile DSM 15176
Tannerella forsythia ATCC 43037
