# Supplementary material for: Metagenomic Data Utilization and Analysis (MEDUSA) and Construction of a Global Gut Microbial Gene Catalogue
Source: PLoS Comput Biol. 2014 Jul 10;10(7):e1003706. doi: 10.1371/journal.pcbi.1003706 (PMC4091689; doi:10.1371/journal.pcbi.1003706)
Supplement: Table S5 — Enterotype distribution in each study. (XLSX) [file pcbi.1003706.s016.xlsx]

## Sheet: ST5. Enterotype Distribution
Enterotype	China	HMP	MetaHIT	Sweden
1	257	124	58	4
2	69	17	26	2
3	37	9	40	139
