# Supplementary material for: Metagenomic Data Utilization and Analysis (MEDUSA) and Construction of a Global Gut Microbial Gene Catalogue
Source: PLoS Comput Biol. 2014 Jul 10;10(7):e1003706. doi: 10.1371/journal.pcbi.1003706 (PMC4091689; doi:10.1371/journal.pcbi.1003706)
Supplement: Table S7 — Sample and repeated visit information. (XLSX) [file pcbi.1003706.s018.xlsx]

## Sheet: ST7. Individual information
Sample	Study	Individual	Visit
SRR341581	China	SRR341581	1
SRR341582	China	SRR341582	1
SRR341583	China	SRR341583	1
SRR341584	China	SRR341584	1
SRR341585	China	SRR341585	1
SRR341586	China	SRR341586	1
SRR341587	China	SRR341587	1
SRR341588	China	SRR341588	1
SRR341589	China	SRR341589	1
SRR341590	China	SRR341590	1
SRR341591	China	SRR341591	1
SRR341592	China	SRR341592	1
SRR341593	China	SRR341593	1
SRR341594	China	SRR341594	1
SRR341595	China	SRR341595	1
SRR341596	China	SRR341596	1
SRR341597	China	SRR341597	1
SRR341598	China	SRR341598	1
SRR341599	China	SRR341599	1
SRR341600	China	SRR341600	1
SRR341601	China	SRR341601	1
SRR341602	China	SRR341602	1
SRR341603	China	SRR341603	1
SRR341604	China	SRR341604	1
SRR341605	China	SRR341605	1
SRR341606	China	SRR341606	1
SRR341607	China	SRR341607	1
SRR341608	China	SRR341608	1
SRR341609	China	SRR341609	1
SRR341610	China	SRR341610	1
SRR341611	China	SRR341611	1
SRR341612	China	SRR341612	1
SRR341613	China	SRR341613	1
SRR341614	China	SRR341614	1
SRR341615	China	SRR341615	1
SRR341616	China	SRR341616	1
SRR341617	China	SRR341617	1
SRR341618	China	SRR341618	1
SRR341619	China	SRR341619	1
SRR341620	China	SRR341620	1
SRR341621	China	SRR341621	1
SRR341622	China	SRR341622	1
SRR341623	China	SRR341623	1
SRR341624	China	SRR341624	1
SRR341625	China	SRR341625	1
SRR341626	China	SRR341626	1
SRR341627	China	SRR341627	1
SRR341628	China	SRR341628	1
SRR341629	China	SRR341629	1
SRR341630	China	SRR341630	1
SRR341631	China	SRR341631	1
SRR341632	China	SRR341632	1
SRR341633	China	SRR341633	1
SRR341634	China	SRR341634	1
SRR341635	China	SRR341635	1
SRR341636	China	SRR341636	1
SRR341637	China	SRR341637	1
SRR341638	China	SRR341638	1
SRR341639	China	SRR341639	1
SRR341640	China	SRR341640	1
SRR341641	China	SRR341641	1
SRR341642	China	SRR341642	1
SRR341643	China	SRR341643	1
SRR341644	China	SRR341644	1
SRR341645	China	SRR341645	1
SRR341646	China	SRR341646	1
SRR341647	China	SRR341647	1
SRR341648	China	SRR341648	1
SRR341649	China	SRR341649	1
SRR341650	China	SRR341650	1
SRR341651	China	SRR341651	1
SRR341652	China	SRR341652	1
SRR341653	China	SRR341653	1
SRR341654	China	SRR341654	1
SRR341655	China	SRR341655	1
SRR341656	China	SRR341656	1
SRR341657	China	SRR341657	1
SRR341658	China	SRR341658	1
SRR341659	China	SRR341659	1
SRR341660	China	SRR341660	1
SRR341661	China	SRR341661	1
SRR341662	China	SRR341662	1
SRR341663	China	SRR341663	1
SRR341664	China	SRR341664	1
SRR341665	China	SRR341665	1
SRR341666	China	SRR341666	1
SRR341667	China	SRR341667	1
SRR341668	China	SRR341668	1
SRR341669	China	SRR341669	1
SRR341670	China	SRR341670	1
SRR341671	China	SRR341671	1
SRR341672	China	SRR341672	1
SRR341673	China	SRR341673	1
SRR341674	China	SRR341674	1
SRR341675	China	SRR341675	1
SRR341676	China	SRR341676	1
SRR341677	China	SRR341677	1
SRR341678	China	SRR341678	1
SRR341679	China	SRR341679	1
SRR341680	China	SRR341680	1
SRR341681	China	SRR341681	1
SRR341682	China	SRR341682	1
SRR341683	China	SRR341683	1
SRR341684	China	SRR341684	1
SRR341685	China	SRR341685	1
SRR341686	China	SRR341686	1
SRR341687	China	SRR341687	1
SRR341688	China	SRR341688	1
SRR341689	China	SRR341689	1
SRR341690	China	SRR341690	1
SRR341691	China	SRR341691	1
SRR341692	China	SRR341692	1
SRR341693	China	SRR341693	1
SRR341694	China	SRR341694	1
SRR341695	China	SRR341695	1
SRR341696	China	SRR341696	1
SRR341697	China	SRR341697	1
SRR341698	China	SRR341698	1
SRR341699	China	SRR341699	1
SRR341700	China	SRR341700	1
SRR341701	China	SRR341701	1
SRR341702	China	SRR341702	1
SRR341703	China	SRR341703	1
SRR341704	China	SRR341704	1
SRR341705	China	SRR341705	1
SRR341706	China	SRR341706	1
SRR341707	China	SRR341707	1
SRR341708	China	SRR341708	1
SRR341709	China	SRR341709	1
SRR341710	China	SRR341710	1
SRR341711	China	SRR341711	1
SRR341712	China	SRR341712	1
SRR341713	China	SRR341713	1
SRR341714	China	SRR341714	1
SRR341715	China	SRR341715	1
SRR341716	China	SRR341716	1
SRR341717	China	SRR341717	1
SRR341718	China	SRR341718	1
SRR341719	China	SRR341719	1
SRR341720	China	SRR341720	1
SRR341721	China	SRR341721	1
SRR341722	China	SRR341722	1
SRR341723	China	SRR341723	1
SRR341724	China	SRR341724	1
SRR341725	China	SRR341725	1
SRR413556	China	SRR413556	1
SRR413557	China	SRR413557	1
SRR413558	China	SRR413558	1
SRR413559	China	SRR413559	1
SRR413560	China	SRR413560	1
SRR413561	China	SRR413561	1
SRR413562	China	SRR413562	1
SRR413563	China	SRR413563	1
SRR413564	China	SRR413564	1
SRR413565	China	SRR413565	1
SRR413566	China	SRR413566	1
SRR413567	China	SRR413567	1
SRR413568	China	SRR413568	1
SRR413569	China	SRR413569	1
SRR413570	China	SRR413570	1
SRR413571	China	SRR413571	1
SRR413572	China	SRR413572	1
SRR413573	China	SRR413573	1
SRR413574	China	SRR413574	1
SRR413575	China	SRR413575	1
SRR413576	China	SRR413576	1
SRR413577	China	SRR413577	1
SRR413578	China	SRR413578	1
SRR413579	China	SRR413579	1
SRR413580	China	SRR413580	1
SRR413581	China	SRR413581	1
SRR413582	China	SRR413582	1
SRR413583	China	SRR413583	1
SRR413584	China	SRR413584	1
SRR413585	China	SRR413585	1
SRR413586	China	SRR413586	1
SRR413587	China	SRR413587	1
SRR413588	China	SRR413588	1
SRR413589	China	SRR413589	1
SRR413590	China	SRR413590	1
SRR413591	China	SRR413591	1
SRR413592	China	SRR413592	1
SRR413593	China	SRR413593	1
SRR413594	China	SRR413594	1
SRR413595	China	SRR413595	1
SRR413596	China	SRR413596	1
SRR413597	China	SRR413597	1
SRR413598	China	SRR413598	1
SRR413599	China	SRR413599	1
SRR413600	China	SRR413600	1
SRR413601	China	SRR413601	1
SRR413602	China	SRR413602	1
SRR413603	China	SRR413603	1
SRR413604	China	SRR413604	1
SRR413605	China	SRR413605	1
SRR413606	China	SRR413606	1
SRR413607	China	SRR413607	1
SRR413608	China	SRR413608	1
SRR413609	China	SRR413609	1
SRR413610	China	SRR413610	1
SRR413611	China	SRR413611	1
SRR413612	China	SRR413612	1
SRR413613	China	SRR413613	1
SRR413614	China	SRR413614	1
SRR413615	China	SRR413615	1
SRR413616	China	SRR413616	1
SRR413617	China	SRR413617	1
SRR413618	China	SRR413618	1
SRR413619	China	SRR413619	1
SRR413620	China	SRR413620	1
SRR413621	China	SRR413621	1
SRR413622	China	SRR413622	1
SRR413623	China	SRR413623	1
SRR413624	China	SRR413624	1
SRR413625	China	SRR413625	1
SRR413626	China	SRR413626	1
SRR413627	China	SRR413627	1
SRR413628	China	SRR413628	1
SRR413629	China	SRR413629	1
SRR413630	China	SRR413630	1
SRR413631	China	SRR413631	1
SRR413632	China	SRR413632	1
SRR413633	China	SRR413633	1
SRR413634	China	SRR413634	1
SRR413635	China	SRR413635	1
SRR413636	China	SRR413636	1
SRR413637	China	SRR413637	1
SRR413638	China	SRR413638	1
SRR413639	China	SRR413639	1
SRR413640	China	SRR413640	1
SRR413641	China	SRR413641	1
SRR413642	China	SRR413642	1
SRR413643	China	SRR413643	1
SRR413644	China	SRR413644	1
SRR413645	China	SRR413645	1
SRR413646	China	SRR413646	1
SRR413647	China	SRR413647	1
SRR413648	China	SRR413648	1
SRR413649	China	SRR413649	1
SRR413650	China	SRR413650	1
SRR413651	China	SRR413651	1
SRR413652	China	SRR413652	1
SRR413653	China	SRR413653	1
SRR413654	China	SRR413654	1
SRR413655	China	SRR413655	1
SRR413656	China	SRR413656	1
SRR413657	China	SRR413657	1
SRR413658	China	SRR413658	1
SRR413659	China	SRR413659	1
SRR413660	China	SRR413660	1
SRR413661	China	SRR413661	1
SRR413662	China	SRR413662	1
SRR413663	China	SRR413663	1
SRR413664	China	SRR413664	1
SRR413665	China	SRR413665	1
SRR413666	China	SRR413666	1
SRR413667	China	SRR413667	1
SRR413668	China	SRR413668	1
SRR413669	China	SRR413669	1
SRR413670	China	SRR413670	1
SRR413671	China	SRR413671	1
SRR413672	China	SRR413672	1
SRR413673	China	SRR413673	1
SRR413674	China	SRR413674	1
SRR413675	China	SRR413675	1
SRR413676	China	SRR413676	1
SRR413677	China	SRR413677	1
SRR413678	China	SRR413678	1
SRR413679	China	SRR413679	1
SRR413680	China	SRR413680	1
SRR413681	China	SRR413681	1
SRR413682	China	SRR413682	1
SRR413683	China	SRR413683	1
SRR413684	China	SRR413684	1
SRR413685	China	SRR413685	1
SRR413686	China	SRR413686	1
SRR413687	China	SRR413687	1
SRR413688	China	SRR413688	1
SRR413689	China	SRR413689	1
SRR413690	China	SRR413690	1
SRR413691	China	SRR413691	1
SRR413692	China	SRR413692	1
SRR413693	China	SRR413693	1
SRR413694	China	SRR413694	1
SRR413695	China	SRR413695	1
SRR413696	China	SRR413696	1
SRR413697	China	SRR413697	1
SRR413698	China	SRR413698	1
SRR413699	China	SRR413699	1
SRR413700	China	SRR413700	1
SRR413701	China	SRR413701	1
SRR413702	China	SRR413702	1
SRR413703	China	SRR413703	1
SRR413704	China	SRR413704	1
SRR413705	China	SRR413705	1
SRR413706	China	SRR413706	1
SRR413707	China	SRR413707	1
SRR413708	China	SRR413708	1
SRR413709	China	SRR413709	1
SRR413710	China	SRR413710	1
SRR413711	China	SRR413711	1
SRR413712	China	SRR413712	1
SRR413713	China	SRR413713	1
SRR413714	China	SRR413714	1
SRR413715	China	SRR413715	1
SRR413716	China	SRR413716	1
SRR413717	China	SRR413717	1
SRR413718	China	SRR413718	1
SRR413719	China	SRR413719	1
SRR413720	China	SRR413720	1
SRR413721	China	SRR413721	1
SRR413722	China	SRR413722	1
SRR413723	China	SRR413723	1
SRR413724	China	SRR413724	1
SRR413725	China	SRR413725	1
SRR413726	China	SRR413726	1
SRR413727	China	SRR413727	1
SRR413728	China	SRR413728	1
SRR413729	China	SRR413729	1
SRR413730	China	SRR413730	1
SRR413731	China	SRR413731	1
SRR413732	China	SRR413732	1
SRR413733	China	SRR413733	1
SRR413734	China	SRR413734	1
SRR413735	China	SRR413735	1
SRR413736	China	SRR413736	1
SRR413737	China	SRR413737	1
SRR413738	China	SRR413738	1
SRR413739	China	SRR413739	1
SRR413740	China	SRR413740	1
SRR413741	China	SRR413741	1
SRR413742	China	SRR413742	1
SRR413743	China	SRR413743	1
SRR413744	China	SRR413744	1
SRR413745	China	SRR413745	1
SRR413746	China	SRR413746	1
SRR413747	China	SRR413747	1
SRR413748	China	SRR413748	1
SRR413749	China	SRR413749	1
SRR413750	China	SRR413750	1
SRR413751	China	SRR413751	1
SRR413752	China	SRR413752	1
SRR413753	China	SRR413753	1
SRR413754	China	SRR413754	1
SRR413755	China	SRR413755	1
SRR413756	China	SRR413756	1
SRR413757	China	SRR413757	1
SRR413758	China	SRR413758	1
SRR413759	China	SRR413759	1
SRR413760	China	SRR413760	1
SRR413761	China	SRR413761	1
SRR413762	China	SRR413762	1
SRR413763	China	SRR413763	1
SRR413764	China	SRR413764	1
SRR413765	China	SRR413765	1
SRR413766	China	SRR413766	1
SRR413767	China	SRR413767	1
SRR413768	China	SRR413768	1
SRR413769	China	SRR413769	1
SRR413770	China	SRR413770	1
SRR413771	China	SRR413771	1
SRR413772	China	SRR413772	1
SRR413773	China	SRR413773	1
SRS011061	HMP	158458797	1
SRS011084	HMP	158479027	1
SRS011239	HMP	158742018	1
SRS011271	HMP	158802708	1
SRS011302	HMP	158944319	1
SRS011405	HMP	159247771	1
SRS011452	HMP	159146620	1
SRS011529	HMP	159166850	1
SRS011586	HMP	159733294	1
SRS012273	HMP	158337416	1
SRS012902	HMP	158883629	1
SRS013158	HMP	159369152	1
SRS013215	HMP	159591683	1
SRS013476	HMP	159207311	1
SRS013521	HMP	159227541	1
SRS013687	HMP	159268001	1
SRS013800	HMP	159571453	1
SRS013951	HMP	763496533	1
SRS014235	HMP	763678604	1
SRS014287	HMP	763536994	1
SRS014313	HMP	763820215	1
SRS014459	HMP	763577454	1
SRS014613	HMP	763840445	1
SRS014683	HMP	763961826	1
SRS014923	HMP	763860675	1
SRS014979	HMP	764062976	1
SRS015065	HMP	763577454	2
SRS015133	HMP	763901136	1
SRS015190	HMP	763759525	1
SRS015217	HMP	764143897	1
SRS015264	HMP	763982056	1
SRS015369	HMP	764042746	1
SRS015431	HMP	764083206	1
SRS015578	HMP	764285508	1
SRS015663	HMP	764487809	1
SRS015782	HMP	764224817	1
SRS015794	HMP	763435843	2
SRS015854	HMP	764002286	2
SRS015890	HMP	764305738	1
SRS015960	HMP	764325968	1
SRS016018	HMP	764447348	1
SRS016056	HMP	764508039	1
SRS016095	HMP	764588959	1
SRS016203	HMP	764649650	1
SRS016267	HMP	764669880	1
SRS016335	HMP	765074482	1
SRS016495	HMP	159753524	1
SRS016585	HMP	159915365	1
SRS016753	HMP	160421117	1
SRS016954	HMP	159611913	1
SRS016989	HMP	159490532	1
SRS017103	HMP	159551223	1
SRS017191	HMP	159814214	1
SRS017247	HMP	159510762	1
SRS017307	HMP	159632143	1
SRS017433	HMP	160319967	1
SRS017521	HMP	160502038	1
SRS017701	HMP	160582958	1
SRS017821	HMP	160603188	1
SRS018133	HMP	160158126	1
SRS018313	HMP	160380657	1
SRS018351	HMP	160178356	1
SRS018427	HMP	160218816	1
SRS018575	HMP	765094712	1
SRS018656	HMP	765013792	1
SRS018817	HMP	765135172	1
SRS018984	HMP	764305738	2
SRS019030	HMP	763961826	2
SRS019068	HMP	764083206	2
SRS019161	HMP	763496533	2
SRS019267	HMP	765034022	1
SRS019381	HMP	765337473	1
SRS019397	HMP	765560005	1
SRS019582	HMP	763597684	2
SRS019601	HMP	765620695	1
SRS019685	HMP	763678604	2
SRS019787	HMP	764669880	2
SRS019910	HMP	764892411	2
SRS019968	HMP	160643649	1
SRS020233	HMP	160400887	1
SRS020328	HMP	160704339	1
SRS020869	HMP	160765029	1
SRS021484	HMP	158479027	2
SRS021948	HMP	158256496	2
SRS022071	HMP	158337416	2
SRS022137	HMP	638754422	1
SRS022609	HMP	158499257	2
SRS022713	HMP	370425937	1
SRS023346	HMP	246515023	1
SRS023526	HMP	158802708	2
SRS023583	HMP	159005010	2
SRS023829	HMP	158883629	2
SRS023914	HMP	159268001	2
SRS023971	HMP	159369152	2
SRS024009	HMP	159247771	2
SRS024075	HMP	159510762	2
SRS024132	HMP	159207311	2
SRS024265	HMP	158944319	2
SRS024331	HMP	159551223	2
SRS024388	HMP	159713063	2
SRS024435	HMP	159571453	2
SRS024549	HMP	159591683	2
SRS024625	HMP	159611913	2
SRS042284	HMP	764811490	2
SRS042628	HMP	764447348	2
SRS043001	HMP	550534656	1
SRS043411	HMP	763759525	2
SRS043701	HMP	159814214	2
SRS045004	HMP	604812005	1
SRS045645	HMP	604812005	2
SRS045713	HMP	404239096	1
SRS047014	HMP	765074482	2
SRS047044	HMP	764224817	2
SRS048164	HMP	861967750	1
SRS048870	HMP	764184357	2
SRS049164	HMP	765074482	2
SRS049712	HMP	823052294	1
SRS049900	HMP	686765762	1
SRS049959	HMP	765701615	1
SRS049995	HMP	159227541	2
SRS050299	HMP	763982056	2
SRS050422	HMP	763536994	2
SRS050752	HMP	765640925	1
SRS050925	HMP	763860675	2
SRS051031	HMP	764487809	2
SRS051882	HMP	764143897	2
SRS052027	HMP	159490532	2
SRS052697	HMP	706846339	1
SRS053214	HMP	159753524	2
SRS053335	HMP	508703490	1
SRS053398	HMP	675950834	1
SRS054590	HMP	338793263	1
SRS054956	HMP	737052003	1
SRS055982	HMP	638754422	2
SRS056259	HMP	764325968	2
SRS056519	HMP	765094712	2
SRS057478	HMP	370425937	2
SRS057717	HMP	246515023	2
SRS058723	HMP	763820215	2
SRS058770	HMP	160158126	2
SRS062427	HMP	763536994	3
SRS063040	HMP	809635352	2
SRS063985	HMP	763901136	2
SRS064276	HMP	763840445	2
SRS064557	HMP	764042746	2
SRS064645	HMP	686765762	2
SRS065504	HMP	764062976	2
SRS075398	HMP	158883629	3
SRS077730	HMP	159753524	3
SRS078176	HMP	159227541	3
MH0001	MetaHIT	MH0001	1
MH0002	MetaHIT	MH0002	1
MH0003	MetaHIT	MH0003	1
MH0004	MetaHIT	MH0004	1
MH0005	MetaHIT	MH0005	1
MH0006	MetaHIT	MH0006	1
MH0007	MetaHIT	MH0007	1
MH0008	MetaHIT	MH0008	1
MH0009	MetaHIT	MH0009	1
MH0010	MetaHIT	MH0010	1
MH0011	MetaHIT	MH0011	1
MH0012	MetaHIT	MH0012	1
MH0013	MetaHIT	MH0013	1
MH0014	MetaHIT	MH0014	1
MH0015	MetaHIT	MH0015	1
MH0016	MetaHIT	MH0016	1
MH0017	MetaHIT	MH0017	1
MH0018	MetaHIT	MH0018	1
MH0019	MetaHIT	MH0019	1
MH0020	MetaHIT	MH0020	1
MH0021	MetaHIT	MH0021	1
MH0022	MetaHIT	MH0022	1
MH0023	MetaHIT	MH0023	1
MH0024	MetaHIT	MH0024	1
MH0025	MetaHIT	MH0025	1
MH0026	MetaHIT	MH0026	1
MH0027	MetaHIT	MH0027	1
MH0028	MetaHIT	MH0028	1
MH0030	MetaHIT	MH0030	1
MH0031	MetaHIT	MH0031	1
MH0032	MetaHIT	MH0032	1
MH0033	MetaHIT	MH0033	1
MH0034	MetaHIT	MH0034	1
MH0035	MetaHIT	MH0035	1
MH0036	MetaHIT	MH0036	1
MH0037	MetaHIT	MH0037	1
MH0038	MetaHIT	MH0038	1
MH0039	MetaHIT	MH0039	1
MH0040	MetaHIT	MH0040	1
MH0041	MetaHIT	MH0041	1
MH0042	MetaHIT	MH0042	1
MH0043	MetaHIT	MH0043	1
MH0044	MetaHIT	MH0044	1
MH0045	MetaHIT	MH0045	1
MH0046	MetaHIT	MH0046	1
MH0047	MetaHIT	MH0047	1
MH0048	MetaHIT	MH0048	1
MH0049	MetaHIT	MH0049	1
MH0050	MetaHIT	MH0050	1
MH0051	MetaHIT	MH0051	1
MH0052	MetaHIT	MH0052	1
MH0053	MetaHIT	MH0053	1
MH0054	MetaHIT	MH0054	1
MH0055	MetaHIT	MH0055	1
MH0056	MetaHIT	MH0056	1
MH0057	MetaHIT	MH0057	1
MH0058	MetaHIT	MH0058	1
MH0059	MetaHIT	MH0059	1
MH0060	MetaHIT	MH0060	1
MH0061	MetaHIT	MH0061	1
MH0062	MetaHIT	MH0062	1
MH0063	MetaHIT	MH0063	1
MH0064	MetaHIT	MH0064	1
MH0065	MetaHIT	MH0065	1
MH0066	MetaHIT	MH0066	1
MH0067	MetaHIT	MH0067	1
MH0068	MetaHIT	MH0068	1
MH0069	MetaHIT	MH0069	1
MH0070	MetaHIT	MH0070	1
MH0071	MetaHIT	MH0071	1
MH0072	MetaHIT	MH0072	1
MH0073	MetaHIT	MH0073	1
MH0074	MetaHIT	MH0074	1
MH0075	MetaHIT	MH0075	1
MH0076	MetaHIT	MH0076	1
MH0077	MetaHIT	MH0077	1
MH0078	MetaHIT	MH0078	1
MH0079	MetaHIT	MH0079	1
MH0080	MetaHIT	MH0080	1
MH0081	MetaHIT	MH0081	1
MH0082	MetaHIT	MH0082	1
MH0083	MetaHIT	MH0083	1
MH0084	MetaHIT	MH0084	1
MH0085	MetaHIT	MH0085	1
MH0086	MetaHIT	MH0086	1
O2.UC.1	MetaHIT	O2.UC.1	1
O2.UC.11	MetaHIT	O2.UC.11	1
O2.UC.12	MetaHIT	O2.UC.12	1
O2.UC.13	MetaHIT	O2.UC.13	1
O2.UC.14	MetaHIT	O2.UC.14	1
O2.UC.16	MetaHIT	O2.UC.16	1
O2.UC.17	MetaHIT	O2.UC.17	1
O2.UC.18	MetaHIT	O2.UC.18	1
O2.UC.19	MetaHIT	O2.UC.19	1
O2.UC.20	MetaHIT	O2.UC.20	1
O2.UC.21	MetaHIT	O2.UC.21	1
O2.UC.22	MetaHIT	O2.UC.22	1
O2.UC.23	MetaHIT	O2.UC.23	1
O2.UC.24	MetaHIT	O2.UC.24	1
O2.UC.4	MetaHIT	O2.UC.4	1
V1.CD.1	MetaHIT	V1.CD.1	1
V1.CD.11	MetaHIT	V1.CD.11	1
V1.CD.12	MetaHIT	V1.CD.12	1
V1.CD.13	MetaHIT	V1.CD.13	1
V1.CD.14	MetaHIT	V1.CD.14	1
V1.CD.15	MetaHIT	V1.CD.15	1
V1.CD.2	MetaHIT	V1.CD.2	1
V1.CD.3	MetaHIT	V1.CD.3	1
V1.CD.4	MetaHIT	V1.CD.4	1
V1.CD.6	MetaHIT	V1.CD.6	1
V1.CD.8	MetaHIT	V1.CD.8	1
V1.CD.9	MetaHIT	V1.CD.9	1
V1.UC.10	MetaHIT	V1.UC.10	1
V1.UC.13	MetaHIT	V1.UC.13	1
V1.UC.14	MetaHIT	V1.UC.14	1
V1.UC.15	MetaHIT	V1.UC.15	1
V1.UC.17	MetaHIT	V1.UC.17	1
V1.UC.18	MetaHIT	V1.UC.18	1
V1.UC.19	MetaHIT	V1.UC.19	1
V1.UC.21	MetaHIT	V1.UC.21	1
V1.UC.6	MetaHIT	V1.UC.6	1
V1.UC.7	MetaHIT	V1.UC.7	1
V1.UC.8	MetaHIT	V1.UC.8	1
V1.UC.9	MetaHIT	V1.UC.9	1
S112	Sweden	S112	1
S118	Sweden	S118	1
S121	Sweden	S121	1
S126	Sweden	S126	1
S127	Sweden	S127	1
S131	Sweden	S131	1
S137	Sweden	S137	1
S141	Sweden	S141	1
S143	Sweden	S143	1
S144	Sweden	S144	1
S146	Sweden	S146	1
S153	Sweden	S153	1
S155	Sweden	S155	1
S158	Sweden	S158	1
S186	Sweden	S186	1
S187	Sweden	S187	1
S193	Sweden	S193	1
S194	Sweden	S194	1
S195	Sweden	S195	1
S198	Sweden	S198	1
S200	Sweden	S200	1
S205	Sweden	S205	1
S224	Sweden	S224	1
S225	Sweden	S225	1
S227	Sweden	S227	1
S229	Sweden	S229	1
S231	Sweden	S231	1
S235	Sweden	S235	1
S239	Sweden	S239	1
S243	Sweden	S243	1
S244	Sweden	S244	1
S248	Sweden	S248	1
S249	Sweden	S249	1
S258	Sweden	S258	1
S263	Sweden	S263	1
S264	Sweden	S264	1
S268	Sweden	S268	1
S269	Sweden	S269	1
S278	Sweden	S278	1
S286	Sweden	S286	1
S288	Sweden	S288	1
S290	Sweden	S290	1
S297	Sweden	S297	1
S299	Sweden	S299	1
S304	Sweden	S304	1
S305	Sweden	S305	1
S312	Sweden	S312	1
S317	Sweden	S317	1
S327	Sweden	S327	1
S330	Sweden	S330	1
S332	Sweden	S332	1
S334	Sweden	S334	1
S342	Sweden	S342	1
S344	Sweden	S344	1
S347	Sweden	S347	1
S349	Sweden	S349	1
S350	Sweden	S350	1
S353	Sweden	S353	1
S354	Sweden	S354	1
S356	Sweden	S356	1
S365	Sweden	S365	1
S367	Sweden	S367	1
S370	Sweden	S370	1
S372	Sweden	S372	1
S378	Sweden	S378	1
S380	Sweden	S380	1
S381	Sweden	S381	1
S384	Sweden	S384	1
S389	Sweden	S389	1
S393	Sweden	S393	1
S395	Sweden	S395	1
S397	Sweden	S397	1
S398	Sweden	S398	1
S420	Sweden	S420	1
S421	Sweden	S421	1
S422	Sweden	S422	1
S424	Sweden	S424	1
S432	Sweden	S432	1
S434	Sweden	S434	1
S436	Sweden	S436	1
S439	Sweden	S439	1
S441	Sweden	S441	1
S446	Sweden	S446	1
S451	Sweden	S451	1
S456	Sweden	S456	1
S457	Sweden	S457	1
S458	Sweden	S458	1
S462	Sweden	S462	1
S463	Sweden	S463	1
S468	Sweden	S468	1
S470	Sweden	S470	1
S472	Sweden	S472	1
S475	Sweden	S475	1
S476	Sweden	S476	1
S478	Sweden	S478	1
S479	Sweden	S479	1
S483	Sweden	S483	1
S484	Sweden	S484	1
S485	Sweden	S485	1
S487	Sweden	S487	1
S488	Sweden	S488	1
S495	Sweden	S495	1
S497	Sweden	S497	1
S51	Sweden	S51	1
S517	Sweden	S517	1
S524	Sweden	S524	1
S526	Sweden	S526	1
S529	Sweden	S529	1
S53	Sweden	S53	1
S530	Sweden	S530	1
S536	Sweden	S536	1
S54	Sweden	S54	1
S543	Sweden	S543	1
S547	Sweden	S547	1
S550	Sweden	S550	1
S551	Sweden	S551	1
S552	Sweden	S552	1
S558	Sweden	S558	1
S561	Sweden	S561	1
S563	Sweden	S563	1
S577	Sweden	S577	1
S58	Sweden	S58	1
S584	Sweden	S584	1
S587	Sweden	S587	1
S589	Sweden	S589	1
S59	Sweden	S59	1
S591	Sweden	S591	1
S598	Sweden	S598	1
S60	Sweden	S60	1
S600	Sweden	S600	1
S602	Sweden	S602	1
S604	Sweden	S604	1
S614	Sweden	S614	1
S617	Sweden	S617	1
S618	Sweden	S618	1
S628	Sweden	S628	1
S638	Sweden	S638	1
S640	Sweden	S640	1
S643	Sweden	S643	1
S646	Sweden	S646	1
S655	Sweden	S655	1
S77	Sweden	S77	1
S80	Sweden	S80	1
S88	Sweden	S88	1
S92	Sweden	S92	1
