# Supplementary material for: Metagenomic Data Utilization and Analysis (MEDUSA) and Construction of a Global Gut Microbial Gene Catalogue
Source: PLoS Comput Biol. 2014 Jul 10;10(7):e1003706. doi: 10.1371/journal.pcbi.1003706 (PMC4091689; doi:10.1371/journal.pcbi.1003706)
Supplement: Table S8 — Genus assignment of genes using the KEGG database. All refers to all 11 million genes in the gene catalogue while core refers to the core genes. (XLSX) [file pcbi.1003706.s019.xlsx]

## Sheet: ST8. Genus in core genes
	All	Core	Fraction of All	Fraction of Core	FC	adj P of enrichment
Sideroxydans	878	0	7.53e-05	0	0	1
Leptothrix	786	0	6.74e-05	0	0	1
Novosphingobium	762	0	6.54e-05	0	0	1
Hyphomicrobium	743	0	6.37e-05	0	0	1
Sulfuricurvum	475	0	4.07e-05	0	0	1
Borrelia	381	0	3.27e-05	0	0	1
Frateuria	348	0	2.98e-05	0	0	1
Acetobacter	332	0	2.85e-05	0	0	1
Grape	330	0	2.83e-05	0	0	1
Granulobacter	318	0	2.73e-05	0	0	1
Ignisphaera	310	0	2.66e-05	0	0	1
Pyrobaculum	288	0	2.47e-05	0	0	1
Moraxella	262	0	2.25e-05	0	0	1
Natronomonas	259	0	2.22e-05	0	0	1
Phaeobacter	215	0	1.84e-05	0	0	1
Methanothermococcus	210	0	1.8e-05	0	0	1
Methylocystis	205	0	1.76e-05	0	0	1
Halalkalicoccus	186	0	1.6e-05	0	0	1
Thermoplasma	186	0	1.6e-05	0	0	1
Amycolicicoccus	181	0	1.55e-05	0	0	1
Kinetoplastibacterium	172	0	1.48e-05	0	0	1
Thermoproteus	158	0	1.36e-05	0	0	1
Desulfurococcus	154	0	1.32e-05	0	0	1
Erythrobacter	149	0	1.28e-05	0	0	1
Haloquadratum	139	0	1.19e-05	0	0	1
Brevundimonas	139	0	1.19e-05	0	0	1
Staphylothermus	135	0	1.16e-05	0	0	1
Reptiles	134	0	1.15e-05	0	0	1
Orientia	124	0	1.06e-05	0	0	1
Nitrososphaera	113	0	9.69e-06	0	0	1
Acidimicrobium	100	0	8.58e-06	0	0	1
Cardinium	98	0	8.41e-06	0	0	1
Acidianus	91	0	7.81e-06	0	0	1
Halovivax	91	0	7.81e-06	0	0	1
Caldisphaera	90	0	7.72e-06	0	0	1
Ehrlichia	88	0	7.55e-06	0	0	1
Metallosphaera	88	0	7.55e-06	0	0	1
Midichloria	82	0	7.03e-06	0	0	1
Buchnera	75	0	6.43e-06	0	0	1
Cenarchaeum	71	0	6.09e-06	0	0	1
Pezizomycetes	70	0	6e-06	0	0	1
Endolissoclinum	66	0	5.66e-06	0	0	1
Chlamydophila	64	0	5.49e-06	0	0	1
Pyrolobus	59	0	5.06e-06	0	0	1
Ruthia	58	0	4.97e-06	0	0	1
Halobacterium	54	0	4.63e-06	0	0	1
Thermosphaera	52	0	4.46e-06	0	0	1
Sulcia	41	0	3.52e-06	0	0	1
Anaplasma	41	0	3.52e-06	0	0	1
Acidilobus	40	0	3.43e-06	0	0	1
Vesicomyosocius	37	0	3.17e-06	0	0	1
Wigglesworthia	32	0	2.74e-06	0	0	1
Neorickettsia	32	0	2.74e-06	0	0	1
Blochmannia	31	0	2.66e-06	0	0	1
Tropheryma	23	0	1.97e-06	0	0	1
Carsonella	11	0	9.43e-07	0	0	1
Nanoarchaeum	11	0	9.43e-07	0	0	1
Portiera	10	0	8.58e-07	0	0	1
Riesia	9	0	7.72e-07	0	0	1
Moranella	4	0	3.43e-07	0	0	1
Baumannia	2	0	1.72e-07	0	0	1
Zinderia	2	0	1.72e-07	0	0	1
Hodgkinia	1	0	8.58e-08	0	0	0.6935
Polaromonas	1854	1	0.000159017	3.52e-06	0.0221661	1
Haemophilus	26396	17	0.00226398	5.99e-05	0.0264673	1
Minibacterium	2497	2	0.000214167	7.05e-06	0.0329162	1
Pusillimonas	1077	1	9.24e-05	3.52e-06	0.0381578	1
Herbaspirillum	2708	3	0.000232265	1.06e-05	0.0455272	1
Rickettsia	807	1	6.92e-05	3.52e-06	0.0509243	1
Gallionella	789	1	6.77e-05	3.52e-06	0.0520861	1
Methylovorus	782	1	6.71e-05	3.52e-06	0.0525523	1
Crinalium	754	1	6.47e-05	3.52e-06	0.0545039	1
Nitrosococcus	1451	2	0.000124452	7.05e-06	0.0566449	1
Weissella	1338	2	0.00011476	7.05e-06	0.0614289	1
Ferrimonas	663	1	5.69e-05	3.52e-06	0.0619848	1
Turneriella	661	1	5.67e-05	3.52e-06	0.0621723	1
Thiomonas	1258	2	0.000107898	7.05e-06	0.0653353	1
Nitrosospira	629	1	5.39e-05	3.52e-06	0.0653353	1
Collimonas	2446	4	0.000209793	1.41e-05	0.0672051	1
Enterobacter	22010	36	0.00188779	0.000126892	0.0672173	1
Methanohalobium	603	1	5.17e-05	3.52e-06	0.0681524	1
Klebsiella	21077	36	0.00180777	0.000126892	0.0701928	1
Azotobacter	576	1	4.94e-05	3.52e-06	0.0713471	1
Azospira	1717	3	0.000147267	1.06e-05	0.0718042	1
Magnetospirillum	2764	5	0.000237068	1.76e-05	0.0743414	1
Kangiella	547	1	4.69e-05	3.52e-06	0.0751296	1
Elusimicrobium	4368	8	0.000374643	2.82e-05	0.0752672	1
Cucumber	1086	2	9.31e-05	7.05e-06	0.0756831	1
Rhodoferax	971	2	8.33e-05	7.05e-06	0.0846466	1
Pleurocapsa	479	1	4.11e-05	3.52e-06	0.0857952	1
Acidithiobacillus	1399	3	0.000119992	1.06e-05	0.0881256	1
Saccharopolyspora	460	1	3.95e-05	3.52e-06	0.0893389	1
Dehalococcoides	9575	21	0.000821246	7.4e-05	0.090132	1
Leptospira	1318	3	0.000113045	1.06e-05	0.0935415	1
Sulfolobus	427	1	3.66e-05	3.52e-06	0.0962433	1
Achromobacter	1695	4	0.00014538	1.41e-05	0.0969815	1
Methylacidiphilum	837	2	7.18e-05	7.05e-06	0.0981981	1
Nautilia	412	1	3.53e-05	3.52e-06	0.0997474	1
Nitrobacter	410	1	3.52e-05	3.52e-06	0.100234	1
Taylorella	1198	3	0.000102752	1.06e-05	0.102911	1
Hydrogenobacter	392	1	3.36e-05	3.52e-06	0.104837	1
Simiduia	388	1	3.33e-05	3.52e-06	0.105917	1
Acidovorax	3477	9	0.000298222	3.17e-05	0.106374	1
Sphingomonas	768	2	6.59e-05	7.05e-06	0.107021	1
Gloeocapsa	758	2	6.5e-05	7.05e-06	0.108432	1
Thermosynechococcus	379	1	3.25e-05	3.52e-06	0.108432	1
Coraliomargarita	6341	17	0.000543866	5.99e-05	0.110177	1
Akkermansia	32588	88	0.00279507	0.000310181	0.110975	1
Calditerrivibrio	1108	3	9.5e-05	1.06e-05	0.111271	1
Methanococcoides	738	2	6.33e-05	7.05e-06	0.111371	1
Bartonella	736	2	6.31e-05	7.05e-06	0.111674	1
Veillonella	37362	103	0.00320453	0.000363053	0.113294	1
Halomonas	718	2	6.16e-05	7.05e-06	0.114473	1
Aromatoleum	1071	3	9.19e-05	1.06e-05	0.115115	1
Listonella	353	1	3.03e-05	3.52e-06	0.116419	1
Ramlibacter	694	2	5.95e-05	7.05e-06	0.118432	1
Microcoleus	1031	3	8.84e-05	1.06e-05	0.119581	1
Methanosaeta	1369	4	0.000117419	1.41e-05	0.120076	1
Cycloclasticus	341	1	2.92e-05	3.52e-06	0.120516	1
Ralstonia	3382	10	0.000290073	3.52e-05	0.121514	1
Methanotorris	334	1	2.86e-05	3.52e-06	0.123042	1
Herminiimonas	1991	6	0.000170768	2.11e-05	0.123845	1
Methanothermus	329	1	2.82e-05	3.52e-06	0.124912	1
Nitrosomonas	2597	8	0.000222744	2.82e-05	0.126595	1
Ureaplasma	318	1	2.73e-05	3.52e-06	0.129232	1
Kineococcus	318	1	2.73e-05	3.52e-06	0.129232	1
Aciduliprofundum	1268	4	0.000108756	1.41e-05	0.12964	1
Cupriavidus	4376	14	0.000375329	4.93e-05	0.131477	1
Agromonas	312	1	2.68e-05	3.52e-06	0.131718	1
Delftia	1871	6	0.000160475	2.11e-05	0.131788	1
Methanosphaera	3736	12	0.000320436	4.23e-05	0.132	1
Bordetella	5530	18	0.000474307	6.34e-05	0.133766	1
Neisseria	2750	9	0.000235867	3.17e-05	0.134496	1
Accumulibacter	1219	4	0.000104553	1.41e-05	0.134851	1
Bradyrhizobium	1511	5	0.000129598	1.76e-05	0.135989	1
Spurge	596	2	5.11e-05	7.05e-06	0.137906	1
Methanocaldococcus	892	3	7.65e-05	1.06e-05	0.138215	1
Alicycliphilus	1183	4	0.000101466	1.41e-05	0.138955	1
Gramella	2041	7	0.000175056	2.47e-05	0.140946	1
Calothrix	1455	5	0.000124795	1.76e-05	0.141223	1
Citrobacter	6096	21	0.000522853	7.4e-05	0.141571	1
Rhodospirillum	4632	16	0.000397286	5.64e-05	0.141955	1
Salinibacter	578	2	4.96e-05	7.05e-06	0.1422	1
Marivirga	1725	6	0.000147953	2.11e-05	0.142942	1
Dechloromonas	2004	7	0.000171883	2.47e-05	0.143549	1
Thermovibrio	857	3	7.35e-05	1.06e-05	0.14386	1
Saprospira	1401	5	0.000120163	1.76e-05	0.146666	1
Rubrivivax	1380	5	0.000118362	1.76e-05	0.148898	1
Thermomonospora	551	2	4.73e-05	7.05e-06	0.149168	1
Dactylococcopsis	547	2	4.69e-05	7.05e-06	0.150259	1
Blastococcus	273	1	2.34e-05	3.52e-06	0.150534	1
Leuconostoc	5966	22	0.000511703	7.75e-05	0.151544	1
Thioflavicoccus	542	2	4.65e-05	7.05e-06	0.151645	1
Krokinobacter	800	3	6.86e-05	1.06e-05	0.15411	1
Catenulispora	794	3	6.81e-05	1.06e-05	0.155274	1
Phycisphaera	1582	6	0.000135688	2.11e-05	0.155863	1
Pelagibacter	259	1	2.22e-05	3.52e-06	0.158671	1
Acidobacterium	515	2	4.42e-05	7.05e-06	0.159596	1
Saccharomonospora	257	1	2.2e-05	3.52e-06	0.159906	1
Thalassolituus	504	2	4.32e-05	7.05e-06	0.163079	1
Sulfurimonas	1000	4	8.58e-05	1.41e-05	0.164384	1
Oligotropha	249	1	2.14e-05	3.52e-06	0.165044	1
Chlorobium	4148	17	0.000355773	5.99e-05	0.168426	1
Thioalkalimicrobium	241	1	2.07e-05	3.52e-06	0.170522	1
Methylomicrobium	949	4	8.14e-05	1.41e-05	0.173218	1
Jonesia	711	3	6.1e-05	1.06e-05	0.1734	1
Phytoplasma	710	3	6.09e-05	1.06e-05	0.173645	1
Bacteriovorax	472	2	4.05e-05	7.05e-06	0.174135	1
Rhodomicrobium	468	2	4.01e-05	7.05e-06	0.175624	1
Mites	3038	13	0.000260569	4.58e-05	0.175855	1
Deferribacter	1631	7	0.000139891	2.47e-05	0.176377	1
Methanohalophilus	465	2	3.99e-05	7.05e-06	0.176757	1
Rhodanobacter	462	2	3.96e-05	7.05e-06	0.177904	1
Halorhabdus	231	1	1.98e-05	3.52e-06	0.177904	1
Mustard	461	2	3.95e-05	7.05e-06	0.17829	1
Beijerinckia	230	1	1.97e-05	3.52e-06	0.178678	1
Simkania	228	1	1.96e-05	3.52e-06	0.180245	1
Ruegeria	455	2	3.9e-05	7.05e-06	0.180641	1
Shewanella	7652	34	0.000656311	0.000119843	0.182601	1
Parachlamydia	448	2	3.84e-05	7.05e-06	0.183464	1
Pelagibacterium	669	3	5.74e-05	1.06e-05	0.184287	1
Natrinema	223	1	1.91e-05	3.52e-06	0.184287	1
Pseudogulbenkiania	890	4	7.63e-05	1.41e-05	0.184701	1
Thermodesulfovibrio	1327	6	0.000113817	2.11e-05	0.185814	1
Gluconobacter	439	2	3.77e-05	7.05e-06	0.187225	1
Pseudomonas	14235	66	0.00122093	0.000232636	0.19054	1
Zymomonas	647	3	5.55e-05	1.06e-05	0.190553	1
Histophilus	1939	9	0.000166308	3.17e-05	0.190749	1
Hahella	1073	5	9.2e-05	1.76e-05	0.1915	1
Leptolyngbya	641	3	5.5e-05	1.06e-05	0.192337	1
Aliivibrio	1064	5	9.13e-05	1.76e-05	0.19312	1
Isosphaera	850	4	7.29e-05	1.41e-05	0.193393	1
Methanosalsum	637	3	5.46e-05	1.06e-05	0.193544	1
Prochlorococcus	839	4	7.2e-05	1.41e-05	0.195928	1
Parvibaculum	830	4	7.12e-05	1.41e-05	0.198053	1
Thermocrinis	206	1	1.77e-05	3.52e-06	0.199495	1
Persephonella	822	4	7.05e-05	1.41e-05	0.19998	1
Photorhabdus	1222	6	0.000104811	2.11e-05	0.20178	1
Singulisphaera	2433	12	0.000208678	4.23e-05	0.202693	1
Yersinia	2631	13	0.00022566	4.58e-05	0.203058	1
Methylobacillus	604	3	5.18e-05	1.06e-05	0.204119	1
Saccharothrix	400	2	3.43e-05	7.05e-06	0.20548	1
Coxiella	398	2	3.41e-05	7.05e-06	0.206512	1
Prevotella	203932	1026	0.0174912	0.00361643	0.206757	1
Sordariomycetes	1391	7	0.000119306	2.47e-05	0.206809	1
Chloracidobacterium	595	3	5.1e-05	1.06e-05	0.207206	1
Lactococcus	18330	93	0.00157216	0.000327805	0.208506	1
Sinorhizobium	2749	14	0.000235781	4.93e-05	0.209292	1
Alkalilimnicola	392	2	3.36e-05	7.05e-06	0.209673	1
Gluconacetobacter	587	3	5.03e-05	1.06e-05	0.21003	1
Riemerella	4094	21	0.000351142	7.4e-05	0.2108	1
Stanieria	583	3	5e-05	1.06e-05	0.211471	1
Haloarcula	194	1	1.66e-05	3.52e-06	0.211835	1
Glaciecola	580	3	4.97e-05	1.06e-05	0.212565	1
Methanococcus	3425	18	0.000293762	6.34e-05	0.215979	1
Erwinia	1514	8	0.000129855	2.82e-05	0.217151	1
Chromobacterium	1133	6	9.72e-05	2.11e-05	0.217631	1
Acinetobacter	2453	13	0.000210393	4.58e-05	0.217793	1
Wolinella	564	3	4.84e-05	1.06e-05	0.218595	1
Thiobacillus	748	4	6.42e-05	1.41e-05	0.219764	1
Aeromonas	1677	9	0.000143836	3.17e-05	0.22055	1
Segniliparus	186	1	1.6e-05	3.52e-06	0.220946	1
Wolbachia	366	2	3.14e-05	7.05e-06	0.224568	1
Owenweeksia	2184	12	0.000187321	4.23e-05	0.225802	1
Maricaulis	182	1	1.56e-05	3.52e-06	0.225802	1
Nitratiruptor	540	3	4.63e-05	1.06e-05	0.228311	1
Methylocella	179	1	1.54e-05	3.52e-06	0.229586	1
Propionibacterium	6072	34	0.000520794	0.000119843	0.230115	1
Beutenbergia	1598	9	0.00013706	3.17e-05	0.231454	1
Cyanothece	4422	25	0.000379274	8.81e-05	0.232338	1
Proteus	1237	7	0.000106097	2.47e-05	0.232556	1
Chloroherpeton	1586	9	0.000136031	3.17e-05	0.233205	1
Haloferax	352	2	3.02e-05	7.05e-06	0.233499	1
Morganella	878	5	7.53e-05	1.76e-05	0.234031	1
Entamoeba	2452	14	0.000210308	4.93e-05	0.234642	1
Comamonas	1556	9	0.000133458	3.17e-05	0.237701	1
Leptospirillum	518	3	4.44e-05	1.06e-05	0.238007	1
Pseudanabaena	688	4	5.9e-05	1.41e-05	0.23893	1
Halogeometricum	172	1	1.48e-05	3.52e-06	0.23893	1
Methanopyrus	172	1	1.48e-05	3.52e-06	0.23893	1
Thermosipho	2221	13	0.000190495	4.58e-05	0.240543	1
Nostoc	4934	29	0.000423188	0.000102219	0.241545	1
Rivularia	1020	6	8.75e-05	2.11e-05	0.241741	1
Oscillatoria	2209	13	0.000189465	4.58e-05	0.24185	1
Waddlia	509	3	4.37e-05	1.06e-05	0.242216	1
Methanoregula	1015	6	8.71e-05	2.11e-05	0.242931	1
Caldisericum	1690	10	0.000144951	3.52e-05	0.243171	1
Ignavibacterium	2173	13	0.000186378	4.58e-05	0.245857	1
Cylindrospermum	835	5	7.16e-05	1.76e-05	0.246083	1
Kocuria	167	1	1.43e-05	3.52e-06	0.246083	1
Tolumonas	1159	7	9.94e-05	2.47e-05	0.248207	1
Sulfurihydrogenibium	1300	8	0.000111501	2.82e-05	0.252898	1
Flexibacter	1774	11	0.000152156	3.88e-05	0.254822	1
Thauera	1128	7	9.67e-05	2.47e-05	0.255028	1
Thiocystis	1450	9	0.000124366	3.17e-05	0.255078	1
Schizosaccharomycetes	2899	18	0.000248647	6.34e-05	0.255166	1
Croceibacter	801	5	6.87e-05	1.76e-05	0.256529	1
Chelativorans	798	5	6.84e-05	1.76e-05	0.257493	1
Desulfobacula	2074	13	0.000177887	4.58e-05	0.257592	1
Oenococcus	948	6	8.13e-05	2.11e-05	0.260101	1
Kinetoplasts	12889	82	0.00110549	0.000289033	0.261453	1
Mycobacterium	3299	21	0.000282955	7.4e-05	0.261599	1
Natronobacterium	157	1	1.35e-05	3.52e-06	0.261757	1
Pelodictyon	2029	13	0.000174027	4.58e-05	0.263305	1
Starkeya	468	3	4.01e-05	1.06e-05	0.263435	1
Dictyostelium	2955	19	0.00025345	6.7e-05	0.264238	1
Vibrio	4934	32	0.000423188	0.000112793	0.266532	1
Puniceispirillum	307	2	2.63e-05	7.05e-06	0.267726	1
Azoarcus	2296	15	0.000196927	5.29e-05	0.268484	1
Fluviicola	2436	16	0.000208935	5.64e-05	0.269924	1
Desulfobacca	761	5	6.53e-05	1.76e-05	0.270013	1
Verminephrobacter	760	5	6.52e-05	1.76e-05	0.270368	1
Pseudonocardia	303	2	2.6e-05	7.05e-06	0.27126	1
Variovorax	1357	9	0.00011639	3.17e-05	0.272559	1
Thermodesulfobacterium	603	4	5.17e-05	1.41e-05	0.27261	1
Xenorhabdus	751	5	6.44e-05	1.76e-05	0.273608	1
Methanothermobacter	600	4	5.15e-05	1.41e-05	0.273973	1
Trichormus	150	1	1.29e-05	3.52e-06	0.273973	1
Planctomyces	2996	20	0.000256966	7.05e-05	0.274339	1
Pasteurella	1494	10	0.00012814	3.52e-05	0.275073	1
Aquifex	592	4	5.08e-05	1.41e-05	0.277675	1
Dichelobacter	444	3	3.81e-05	1.06e-05	0.277675	1
Modestobacter	444	3	3.81e-05	1.06e-05	0.277675	1
Desulfurobacterium	1035	7	8.88e-05	2.47e-05	0.277943	1
Advenella	737	5	6.32e-05	1.76e-05	0.278805	1
Sulfobacillus	1178	8	0.000101037	2.82e-05	0.279089	1
Rhodococcus	1469	10	0.000125996	3.52e-05	0.279754	1
Birds	587	4	5.03e-05	1.41e-05	0.28004	1
Sphingobium	730	5	6.26e-05	1.76e-05	0.281479	1
Methanoculleus	1159	8	9.94e-05	2.82e-05	0.283665	1
Aequorivita	1435	10	0.00012308	3.52e-05	0.286383	1
Apicomplexans	3428	24	0.000294019	8.46e-05	0.287719	1
Methanosphaerula	712	5	6.11e-05	1.76e-05	0.288595	1
Lactobacillus	110815	782	0.00950458	0.00275638	0.290006	1
Alteromonas	1839	13	0.000157731	4.58e-05	0.290509	1
Hippea	975	7	8.36e-05	2.47e-05	0.295048	1
Methylophaga	833	6	7.14e-05	2.11e-05	0.296009	1
Methylomonas	971	7	8.33e-05	2.47e-05	0.296263	1
Burkholderia	14386	104	0.00123388	0.000366578	0.297093	1
Other	965	7	8.28e-05	2.47e-05	0.298105	1
Ornithobacterium	2752	20	0.000236038	7.05e-05	0.298662	1
Thermodesulfatator	1094	8	9.38e-05	2.82e-05	0.300519	1
Gloeobacter	1092	8	9.37e-05	2.82e-05	0.301069	1
Halothermothrix	6101	45	0.000523282	0.000158615	0.303117	1
Geodermatophilus	270	2	2.32e-05	7.05e-06	0.304414	1
Gallibacterium	1476	11	0.000126596	3.88e-05	0.30627	1
Salmonella	6574	49	0.000563851	0.000172715	0.306313	1
Methylotenera	802	6	6.88e-05	2.11e-05	0.307451	1
Meiothermus	1069	8	9.17e-05	2.82e-05	0.307547	1
Dictyoglomus	3997	30	0.000342822	0.000105744	0.308451	1
Cryptobacterium	10245	77	0.000878712	0.000271409	0.308871	1
Cyanobium	133	1	1.14e-05	3.52e-06	0.308992	1
Cellulomonas	1592	12	0.000136546	4.23e-05	0.309768	1
Saccharophagus	928	7	7.96e-05	2.47e-05	0.309991	1
Acholeplasma	9869	75	0.000846462	0.000264359	0.312311	1
Caldivirga	263	2	2.26e-05	7.05e-06	0.312516	1
Maribacter	2093	16	0.000179516	5.64e-05	0.314159	1
Francisella	2609	20	0.000223773	7.05e-05	0.315032	1
Fishes	2462	19	0.000211165	6.7e-05	0.31715	1
Gordonia	644	5	5.52e-05	1.76e-05	0.319068	1
Marinomonas	1544	12	0.000132429	4.23e-05	0.319398	1
Pediococcus	2824	22	0.000242214	7.75e-05	0.320152	1
Archaeoglobus	1276	10	0.000109442	3.52e-05	0.322068	1
Leotiomycetes	255	2	2.19e-05	7.05e-06	0.322321	1
Paracoccus	506	4	4.34e-05	1.41e-05	0.324869	1
Campylobacter	9866	78	0.000846205	0.000274933	0.324902	1
Helicobacter	5941	47	0.000509558	0.000165665	0.325115	1
Opitutus	4542	36	0.000389566	0.000126892	0.325727	1
Carboxydothermus	6259	50	0.000536833	0.000176239	0.328295	1
Aggregatibacter	3249	26	0.000278666	9.16e-05	0.328868	1
Syntrophus	1997	16	0.000171282	5.64e-05	0.329261	1
Magnetococcus	1607	13	0.000137832	4.58e-05	0.33245	1
Marinitoga	2966	24	0.000254393	8.46e-05	0.332536	1
Methanomethylovorans	1109	9	9.51e-05	3.17e-05	0.333511	1
Azospirillum	3668	30	0.000314604	0.000105744	0.336117	1
Porphyromonas	22713	186	0.00194809	0.000655611	0.33654	1
Dickeya	2319	19	0.0001989	6.7e-05	0.336706	1
Tsukamurella	244	2	2.09e-05	7.05e-06	0.336852	1
Caulobacter	975	8	8.36e-05	2.82e-05	0.337197	1
Azorhizobium	853	7	7.32e-05	2.47e-05	0.337247	1
Thermococcus	1942	16	0.000166565	5.64e-05	0.338586	1
Colwellia	485	4	4.16e-05	1.41e-05	0.338935	1
Microcystis	968	8	8.3e-05	2.82e-05	0.339636	1
Hyphomonas	363	3	3.11e-05	1.06e-05	0.339636	1
Anoxybacillus	6775	56	0.00058109	0.000197388	0.339686	1
Fusobacterium	17420	144	0.00149411	0.000507569	0.339714	1
Geobacter	11919	99	0.00102229	0.000348954	0.341345	1
Corynebacterium	4082	34	0.000350112	0.000119843	0.342298	1
Oceanithermus	600	5	5.15e-05	1.76e-05	0.342466	1
Liberibacter	120	1	1.03e-05	3.52e-06	0.342466	1
Megasphaera	48013	403	0.00411807	0.00142049	0.344941	1
Phenylobacterium	357	3	3.06e-05	1.06e-05	0.345344	1
Stenotrophomonas	832	7	7.14e-05	2.47e-05	0.345759	1
Salinispora	355	3	3.04e-05	1.06e-05	0.347289	1
Methanosarcina	8160	69	0.000699882	0.00024321	0.347502	1
Dehalogenimonas	827	7	7.09e-05	2.47e-05	0.347849	1
Pantoea	2356	20	0.000202074	7.05e-05	0.348862	1
Rubrobacter	1175	10	0.00010078	3.52e-05	0.349752	1
Pirellula	927	8	7.95e-05	2.82e-05	0.354657	1
Pyrococcus	1506	13	0.000129169	4.58e-05	0.354746	1
Laribacter	1505	13	0.000129084	4.58e-05	0.354981	1
Methanobrevibacter	14572	127	0.00124984	0.000447648	0.358165	1
Cyanobacterium	1144	10	9.81e-05	3.52e-05	0.35923	1
Robiginitalea	1365	12	0.000117076	4.23e-05	0.361283	1
Thermanaerovibrio	2476	22	0.000212366	7.75e-05	0.365149	1
Rhodopirellula	1235	11	0.000105926	3.88e-05	0.366036	1
Ciliates	1678	15	0.000143922	5.29e-05	0.367365	1
Psychrobacter	894	8	7.67e-05	2.82e-05	0.367749	1
Anaerolinea	2786	25	0.000238955	8.81e-05	0.368772	1
Caldilinea	2785	25	0.000238869	8.81e-05	0.368904	1
Mesorhizobium	1558	14	0.000133629	4.93e-05	0.369283	1
Staphylococcus	13681	124	0.00117342	0.000437074	0.37248	1
Sulfurospirillum	1537	14	0.000131828	4.93e-05	0.374328	1
Trichodesmium	764	7	6.55e-05	2.47e-05	0.376533	1
Corallococcus	873	8	7.49e-05	2.82e-05	0.376595	1
Cytophaga	1632	15	0.000139976	5.29e-05	0.37772	1
Pectobacterium	2280	21	0.000195555	7.4e-05	0.378515	1
Xylella	541	5	4.64e-05	1.76e-05	0.379814	1
Halothece	540	5	4.63e-05	1.76e-05	0.380518	1
Rahnella	1611	15	0.000138175	5.29e-05	0.382643	1
Belliella	2789	26	0.000239212	9.16e-05	0.38311	1
Synechococcus	3109	29	0.000266658	0.000102219	0.383333	1
Halobacteroides	5252	49	0.000450463	0.000172715	0.383416	1
Cellulophaga	3727	35	0.000319664	0.000123368	0.385929	1
Streptomyces	5324	50	0.000456638	0.000176239	0.38595	1
Termite	637	6	5.46e-05	2.11e-05	0.387089	1
Desulfococcus	1698	16	0.000145637	5.64e-05	0.387241	1
Serratia	2862	27	0.000245473	9.52e-05	0.387697	1
Sulfurovum	635	6	5.45e-05	2.11e-05	0.388308	1
Thermaerobacter	2416	23	0.00020722	8.11e-05	0.391228	1
Sorangium	1153	11	9.89e-05	3.88e-05	0.392069	1
Idiomarina	314	3	2.69e-05	1.06e-05	0.392636	1
Clavibacter	626	6	5.37e-05	2.11e-05	0.393891	1
Rhizobium	2083	20	0.000178659	7.05e-05	0.394584	1
Granulicella	1760	17	0.000150955	5.99e-05	0.396949	1
Mesotoga	2461	24	0.000211079	8.46e-05	0.400773	1
Conexibacter	922	9	7.91e-05	3.17e-05	0.401153	1
Eurotiomycetes	1331	13	0.00011416	4.58e-05	0.401388	1
Photobacterium	919	9	7.88e-05	3.17e-05	0.402463	1
Fervidicoccus	102	1	8.75e-06	3.52e-06	0.402901	1
Chlorobaculum	1223	12	0.000104896	4.23e-05	0.403231	1
Methylobacterium	2023	20	0.000173512	7.05e-05	0.406287	1
Halobacillus	4344	43	0.000372584	0.000151566	0.406797	1
Mahella	41263	409	0.00353912	0.00144164	0.407344	1
Unknown	3618645	35893	0.31037	0.126515	0.407626	1
Weeksella	2316	23	0.000198643	8.11e-05	0.40812	1
Edwardsiella	1708	17	0.000146495	5.99e-05	0.409034	1
Geitlerinema	399	4	3.42e-05	1.41e-05	0.411989	1
Jannaschia	299	3	2.56e-05	1.06e-05	0.412334	1
Thioalkalivibrio	1393	14	0.000119477	4.93e-05	0.413024	1
Flavobacterium	13474	136	0.00115566	0.000479371	0.414802	1
Bdellovibrio	890	9	7.63e-05	3.17e-05	0.415577	1
Lysinibacillus	9356	95	0.000802462	0.000334855	0.417284	1
Aminobacterium	4818	49	0.000413239	0.000172715	0.417953	1
Eggerthella	112371	1151	0.00963804	0.00405703	0.420939	1
Amphibacillus	8980	92	0.000770213	0.000324281	0.421027	1
Synechocystis	390	4	3.35e-05	1.41e-05	0.421497	1
Pseudoalteromonas	1167	12	0.000100093	4.23e-05	0.42258	1
Legionella	1652	17	0.000141692	5.99e-05	0.4229	1
Psychromonas	1068	11	9.16e-05	3.88e-05	0.423272	1
Cyclobacterium	5326	55	0.00045681	0.000193863	0.424385	1
Muricauda	1734	18	0.000148725	6.34e-05	0.426601	1
Tistrella	769	8	6.6e-05	2.82e-05	0.427526	1
Ochrobactrum	769	8	6.6e-05	2.82e-05	0.427526	1
Methanobacterium	1920	20	0.000164678	7.05e-05	0.428082	1
Thermobifida	384	4	3.29e-05	1.41e-05	0.428082	1
Acidiphilium	384	4	3.29e-05	1.41e-05	0.428082	1
Chlamydia	288	3	2.47e-05	1.06e-05	0.428082	1
Gardnerella	6799	71	0.000583149	0.00025026	0.429153	1
Macrococcus	2008	21	0.000172226	7.4e-05	0.429788	1
Moorella	5737	60	0.000492061	0.000211487	0.429799	1
Petrotoga	2194	23	0.000188179	8.11e-05	0.430814	1
Dothideomycetes	381	4	3.27e-05	1.41e-05	0.431453	1
Exiguobacterium	7120	75	0.000610681	0.000264359	0.432892	1
Bacillus	120342	1275	0.0103217	0.0044941	0.435403	1
Thermobacillus	11703	124	0.00100376	0.000437074	0.435435	1
Flexistipes	750	8	6.43e-05	2.82e-05	0.438356	1
Methanolobus	656	7	5.63e-05	2.47e-05	0.438523	1
Koribacter	1214	13	0.000104125	4.58e-05	0.440072	1
Runella	5129	55	0.000439913	0.000193863	0.440685	1
Kitasatospora	466	5	4e-05	1.76e-05	0.440943	1
Grass	4652	50	0.000399001	0.000176239	0.441702	1
Thermobispora	372	4	3.19e-05	1.41e-05	0.441891	1
Methanocella	2045	22	0.000175399	7.75e-05	0.442108	1
Kyrpidia	3152	34	0.000270346	0.000119843	0.443293	1
Arcobacter	2767	30	0.000237325	0.000105744	0.445565	1
Fervidobacterium	2856	31	0.000244959	0.000109268	0.446069	1
Mesoplasma	644	7	5.52e-05	2.47e-05	0.446695	1
Isoptericola	552	6	4.73e-05	2.11e-05	0.446695	1
Pelotomaculum	4860	53	0.000416841	0.000186814	0.448165	1
Halorhodospira	275	3	2.36e-05	1.06e-05	0.448319	1
Desulfurivibrio	824	9	7.07e-05	3.17e-05	0.448863	1
Pelobacter	3458	38	0.000296592	0.000133942	0.451603	1
Actinosynnema	455	5	3.9e-05	1.76e-05	0.451603	1
Solibacter	2546	28	0.00021837	9.87e-05	0.451958	1
Roseiflexus	2721	30	0.00023338	0.000105744	0.453097	1
Psychroflexus	2175	24	0.000186549	8.46e-05	0.453472	1
Thermoanaerobacter	46164	510	0.00395948	0.00179764	0.45401	1
Parvularcula	181	2	1.55e-05	7.05e-06	0.454098	1
Caldicellulosiruptor	37626	420	0.00322718	0.00148041	0.458733	1
Kribbella	806	9	6.91e-05	3.17e-05	0.458887	1
Halomicrobium	179	2	1.54e-05	7.05e-06	0.459172	1
Insects	3487	39	0.000299079	0.000137467	0.459633	1
Streptosporangium	981	11	8.41e-05	3.88e-05	0.46081	1
Mycoplasma	9251	104	0.000793456	0.000366578	0.462001	1
Marinobacter	1506	17	0.000129169	5.99e-05	0.463898	1
Oceanimonas	531	6	4.55e-05	2.11e-05	0.464361	1
Acetohalobium	4315	49	0.000370097	0.000172715	0.466674	1
Syntrophothermus	4379	50	0.000375586	0.000176239	0.469239	1
Geobacillus	28276	325	0.00242523	0.00114556	0.47235	1
Nocardia	1043	12	8.95e-05	4.23e-05	0.47282	1
Pea	608	7	5.21e-05	2.47e-05	0.473144	1
Denitrovibrio	2832	33	0.0002429	0.000116318	0.478872	1
Rhodobacter	1287	15	0.000110386	5.29e-05	0.478973	1
Thermotoga	5833	68	0.000500295	0.000239686	0.479088	1
Agrobacterium	1714	20	0.000147009	7.05e-05	0.479532	1
Arthrobacter	2485	29	0.000213138	0.000102219	0.47959	1
Coriobacterium	44205	517	0.00379145	0.00182231	0.480638	1
Providencia	855	10	7.33e-05	3.52e-05	0.480654	1
Ferroglobus	342	4	2.93e-05	1.41e-05	0.480654	1
Polynucleobacter	683	8	5.86e-05	2.82e-05	0.481358	1
Thermincola	9021	106	0.000773729	0.000373628	0.482892	1
Halopiger	338	4	2.9e-05	1.41e-05	0.486342	1
Sodalis	253	3	2.17e-05	1.06e-05	0.487303	1
Coprothermobacter	1264	15	0.000108413	5.29e-05	0.487689	1
Allochromatium	756	9	6.48e-05	3.17e-05	0.489237	1
Erysipelothrix	23992	286	0.00205779	0.00100809	0.48989	1
Nonlabens	1258	15	0.000107898	5.29e-05	0.490015	1
Desulfurispirillum	1163	14	9.98e-05	4.93e-05	0.494706	1
Lacinutrix	1329	16	0.000113988	5.64e-05	0.494759	1
Picrophilus	83	1	7.12e-06	3.52e-06	0.495131	1
Nitratifractor	828	10	7.1e-05	3.52e-05	0.496327	1
Microbacterium	496	6	4.25e-05	2.11e-05	0.497128	1
Kytococcus	165	2	1.42e-05	7.05e-06	0.498132	1
Capnocytophaga	6904	84	0.000592155	0.000296082	0.500008	1
Thermovirga	2298	28	0.000197099	9.87e-05	0.500733	1
Listeria	19680	240	0.00168795	0.000845949	0.50117	1
Melissococcus	2212	27	0.000189723	9.52e-05	0.501623	1
Desulfatibacillum	2700	33	0.000231578	0.000116318	0.502283	1
Myxococcus	2038	25	0.000174799	8.81e-05	0.504121	1
Natranaerobius	4880	60	0.000418557	0.000211487	0.505278	1
Natronococcus	244	3	2.09e-05	1.06e-05	0.505278	1
Oceanobacillus	4949	61	0.000424475	0.000215012	0.506537	1
Cellvibrio	811	10	6.96e-05	3.52e-05	0.506731	1
Anaerobaculum	3155	39	0.000270604	0.000137467	0.508	1
Syntrophomonas	9169	114	0.000786423	0.000401826	0.510954	1
Ilyobacter	16538	206	0.00141846	0.000726106	0.511897	1
Hydrogenobaculum	561	7	4.81e-05	2.47e-05	0.512783	1
Methanoplanus	1759	22	0.000150869	7.75e-05	0.513991	1
Herpetosiphon	1511	19	0.000129598	6.7e-05	0.516759	1
Thermosediminibacter	10013	126	0.000858813	0.000444123	0.517136	1
Brucella	395	5	3.39e-05	1.76e-05	0.520201	1
Kosmotoga	1970	25	0.000168967	8.81e-05	0.521522	1
Roseobacter	394	5	3.38e-05	1.76e-05	0.521522	1
Paludibacter	19297	245	0.0016551	0.000863573	0.521765	1
Alkaliphilus	53666	682	0.00460292	0.00240391	0.522256	1
Hirschia	393	5	3.37e-05	1.76e-05	0.522849	1
Thermacetogenium	8768	112	0.00075203	0.000394776	0.524948	1
Desulforudis	1792	23	0.000153699	8.11e-05	0.527459	1
Saccharomycetes	3268	42	0.000280296	0.000148041	0.52816	1
Natrialba	232	3	1.99e-05	1.06e-05	0.531413	1
Microlunatus	540	7	4.63e-05	2.47e-05	0.532725	1
Willow	307	4	2.63e-05	1.41e-05	0.535452	1
Deinococcus	3530	46	0.000302767	0.00016214	0.535527	1
Alcanivorax	843	11	7.23e-05	3.88e-05	0.536246	1
Vulcanisaeta	152	2	1.3e-05	7.05e-06	0.540736	1
Rhodopseudomonas	1589	21	0.000136288	7.4e-05	0.543118	1
Heliobacterium	9868	131	0.000846376	0.000461747	0.545558	1
Chroococcidiopsis	825	11	7.08e-05	3.88e-05	0.547945	1
Melioribacter	2771	37	0.000237668	0.000130417	0.548736	1
Mannheimia	2678	36	0.000229692	0.000126892	0.552447	1
Desulfotomaculum	48975	660	0.00420058	0.00232636	0.553819	1
Alicyclobacillus	3339	45	0.000286385	0.000158615	0.553853	1
Arthromitus	9784	132	0.000839172	0.000465272	0.554442	1
Streptobacillus	3548	48	0.000304311	0.00016919	0.555976	1
Ammonifex	2431	33	0.000208506	0.000116318	0.557863	1
Actinobacillus	4714	64	0.000404319	0.000225586	0.557942	1
Truepera	956	13	8.2e-05	4.58e-05	0.558836	1
Thermoanaerobacterium	33507	457	0.00287389	0.00161083	0.560505	1
Solibacillus	3944	54	0.000338276	0.000190339	0.562672	1
Solitalea	6262	86	0.000537091	0.000303132	0.564396	1
Anaeromyxobacter	1891	26	0.000162191	9.16e-05	0.565042	1
Nitrosopumilus	435	6	3.73e-05	2.11e-05	0.56684	1
Hamiltonella	361	5	3.1e-05	1.76e-05	0.569195	1
Desulfarculus	1227	17	0.00010524	5.99e-05	0.569381	1
Teredinibacter	647	9	5.55e-05	3.17e-05	0.571659	1
Methylibium	1005	14	8.62e-05	4.93e-05	0.57248	1
Acaryochloris	1220	17	0.000104639	5.99e-05	0.572648	1
Sphingopyxis	214	3	1.84e-05	1.06e-05	0.576111	1
Nocardioides	499	7	4.28e-05	2.47e-05	0.576496	1
Thermus	1198	17	0.000102752	5.99e-05	0.583164	1
Sebaldella	16477	234	0.00141323	0.0008248	0.583628	1
Spirosoma	5690	81	0.00048803	0.000285508	0.585021	1
Chitinophaga	7641	109	0.000655367	0.000384202	0.586239	1
Pseudovibrio	769	11	6.6e-05	3.88e-05	0.587848	1
Desulfobulbus	1396	20	0.000119735	7.05e-05	0.588767	1
Desulfosporosinus	45970	662	0.00394284	0.00233341	0.59181	1
Marinithermus	347	5	2.98e-05	1.76e-05	0.59216	1
Mammals	2420	35	0.000207563	0.000123368	0.594362	1
Thermomicrobium	829	12	7.11e-05	4.23e-05	0.594874	1
Xanthobacter	413	6	3.54e-05	2.11e-05	0.597035	1
Frankia	1512	22	0.000129684	7.75e-05	0.597956	1
Streptococcus	161529	2363	0.0138543	0.00832907	0.60119	1
Desulfomonile	2254	33	0.000193325	0.000116318	0.60167	1
Aerococcus	3270	48	0.000280467	0.00016919	0.603243	1
Rhodothermus	2228	33	0.000191095	0.000116318	0.608692	1
Xylanimonas	945	14	8.11e-05	4.93e-05	0.608828	1
Prosthecochloris	537	8	4.61e-05	2.82e-05	0.61223	1
Syntrophobacter	2010	30	0.000172397	0.000105744	0.613372	1
Syntrophobotulus	26932	404	0.00230995	0.00142401	0.616469	1
Methanospirillum	799	12	6.85e-05	4.23e-05	0.61721	1
Stigmatella	1131	17	9.7e-05	5.99e-05	0.61771	1
Emticicia	2654	40	0.000227633	0.000140992	0.619381	1
Arcanobacterium	1304	20	0.000111844	7.05e-05	0.630305	1
Haliscomenobacter	5198	80	0.000445831	0.000281983	0.632488	1
Paenibacillus	77760	1197	0.00666946	0.00421917	0.632611	1
Xanthomonas	1807	28	0.000154986	9.87e-05	0.636793	1
Chromohalobacter	515	8	4.42e-05	2.82e-05	0.638383	1
Carnobacterium	11162	174	0.000957363	0.000613313	0.640628	1
Thiomicrospira	318	5	2.73e-05	1.76e-05	0.646162	1
Fibrella	3677	58	0.000315376	0.000204438	0.648236	1
Haliangium	697	11	5.98e-05	3.88e-05	0.648572	1
Tetragenococcus	3860	61	0.000331071	0.000215012	0.649443	1
Spirochaeta	26833	425	0.00230146	0.00149803	0.650906	1
Atopobium	13657	217	0.00117136	0.000764879	0.652985	1
Terriglobus	1258	20	0.000107898	7.05e-05	0.653353	1
Blattabacterium	124	2	1.06e-05	7.05e-06	0.662837	1
Azobacteroides	1104	18	9.47e-05	6.34e-05	0.670042	1
Halothiobacillus	305	5	2.62e-05	1.76e-05	0.673703	1
Micrococcus	244	4	2.09e-05	1.41e-05	0.673703	1
Tepidanaerobacter	20367	337	0.00174687	0.00118785	0.679988	1
Chamaesiphon	842	14	7.22e-05	4.93e-05	0.683305	1
Thermogladius	60	1	5.15e-06	3.52e-06	0.684932	1
Nakamurella	473	8	4.06e-05	2.82e-05	0.695068	1
Protochlamydia	235	4	2.02e-05	1.41e-05	0.699505	1
Actinoplanes	996	17	8.54e-05	5.99e-05	0.701436	1
Thermodesulfobium	1168	20	0.000100179	7.05e-05	0.703697	1
Halanaerobium	7050	121	0.000604677	0.000426499	0.705334	1
Desulfobacterium	2031	35	0.000174198	0.000123368	0.708201	1
Desulfitobacterium	81406	1406	0.00698218	0.00495585	0.709786	1
Sphaerobacterineae	1504	26	0.000128998	9.16e-05	0.710435	1
Desulfocapsa	980	17	8.41e-05	5.99e-05	0.712888	1
Halorubrum	115	2	9.86e-06	7.05e-06	0.714711	1
Finegoldia	9782	171	0.000839	0.000602739	0.718401	1
Rothia	3009	53	0.000258081	0.000186814	0.723856	1
Olsenella	24352	429	0.00208867	0.00151213	0.723971	1
Asticcacaulis	623	11	5.34e-05	3.88e-05	0.72561	1
Leptotrichia	8197	145	0.000703055	0.000511094	0.726962	1
Haloterrigena	390	7	3.35e-05	2.47e-05	0.737619	1
Dinoroseobacter	277	5	2.38e-05	1.76e-05	0.741803	1
Pseudoxanthomonas	664	12	5.7e-05	4.23e-05	0.742697	1
Brevibacillus	8161	148	0.000699967	0.000521669	0.745276	1
Echinicola	5948	108	0.000510159	0.000380677	0.746193	1
Amoebophilus	935	17	8.02e-05	5.99e-05	0.747198	1
Nitrospira	545	10	4.67e-05	3.52e-05	0.754053	1
Slackia	42629	784	0.00365628	0.00276343	0.755805	1
Desulfohalobium	801	15	6.87e-05	5.29e-05	0.769586	1
Selenomonas	68603	1315	0.00588407	0.0046351	0.787737	1
Dyadobacter	5164	99	0.000442915	0.000348954	0.787857	1
Acetobacterium	35454	680	0.00304088	0.00239686	0.788211	1
Dehalobacter	28408	549	0.00243655	0.00193511	0.794201	1
Zobellia	4525	88	0.000388108	0.000310181	0.799213	1
Methanocorpusculum	4025	79	0.000345223	0.000278458	0.806603	1
Brachybacterium	457	9	3.92e-05	3.17e-05	0.809329	1
Stackebrandtia	452	9	3.88e-05	3.17e-05	0.818281	1
Brachyspira	25008	498	0.00214493	0.00175534	0.818369	1
Sphaerochaeta	27408	554	0.00235078	0.00195273	0.830675	1
Anaerococcus	6975	141	0.000598244	0.000496995	0.830756	1
Zunongwangia	4244	86	0.000364007	0.000303132	0.832763	1
Ignicoccus	98	2	8.41e-06	7.05e-06	0.838692	1
Symbiobacterium	4944	102	0.000424046	0.000359528	0.847853	1
Sanguibacter	1009	21	8.65e-05	7.4e-05	0.855316	1
Acidaminococcus	74357	1551	0.00637758	0.00546695	0.857213	1
Methylococcus	756	16	6.48e-05	5.64e-05	0.869755	1
Pedobacter	16553	353	0.00141975	0.00124425	0.876388	1
Acidothermus	187	4	1.6e-05	1.41e-05	0.879057	1
Amycolatopsis	771	17	6.61e-05	5.99e-05	0.906135	1
Thermobaculum	2394	53	0.000205333	0.000186814	0.909809	1
Niastella	7416	165	0.000636069	0.00058159	0.914351	1
Unclassified	22043	491	0.00189062	0.00173067	0.915397	1
Tannerella	31145	695	0.0026713	0.00244973	0.917054	1
Thermofilum	353	8	3.03e-05	2.82e-05	0.931352	1
Chloroflexus	1830	42	0.000156959	0.000148041	0.943185	1
Cellulosilyticum	72081	1667	0.00618237	0.00587582	0.950415	1
Bifidobacterium	105399	2500	0.00904005	0.00881197	0.97477	1
Treponema	83554	2014	0.00716641	0.00709892	0.990583	1
Cronobacter	1648	40	0.000141349	0.000140992	0.997474	1
Desulfomicrobium	1689	41	0.000144865	0.000144516	0.997592	1
Verrucosispora	410	10	3.52e-05	3.52e-05	1.00234	1
Enterococcus	54689	1335	0.00469067	0.00470559	1.00318	1
Leadbetterella	3141	78	0.000269403	0.000274933	1.02053	1
Gemmatimonas	553	14	4.74e-05	4.93e-05	1.0404	1
Hyperthermus	74	2	6.35e-06	7.05e-06	1.1107	1
Filifactor	16822	456	0.00144282	0.0016073	1.114	0.310035
Korarchaeum	479	13	4.11e-05	4.58e-05	1.11534	1
Clostridium	1332631	36696	0.114299	0.129346	1.13164	0
Oscillibacter	358415	10019	0.0307412	0.0353149	1.14878	0
Amphibians	736	21	6.31e-05	7.4e-05	1.17257	1
Fibrobacter	18743	537	0.00160758	0.00189281	1.17743	0.00333837
Ruminococcus	188068	5534	0.0161306	0.0195062	1.20927	0
Sphingobacterium	7507	222	0.000643874	0.000782503	1.2153	0.0674171
Intrasporangium	269	8	2.31e-05	2.82e-05	1.22218	1
Desulfotalea	1752	55	0.000150269	0.000193863	1.29011	0.73058
Nocardiopsis	858	27	7.36e-05	9.52e-05	1.29323	1
Desulfovibrio	47551	1515	0.00407844	0.00534005	1.30934	0
Renibacterium	200	7	1.72e-05	2.47e-05	1.43836	1
Ethanoligenens	149130	5351	0.0127909	0.0188611	1.47458	0
Ketogulonicigenium	317	12	2.72e-05	4.23e-05	1.55568	1
Odoribacter	103896	4166	0.00891114	0.0146843	1.64786	0
Leifsonia	196	8	1.68e-05	2.82e-05	1.67738	1
Mobiluncus	2950	122	0.000253021	0.000430024	1.69956	6.75e-07
Bibersteinia	1057	44	9.07e-05	0.000155091	1.71071	0.0114255
Micromonospora	637	27	5.46e-05	9.52e-05	1.7419	0.0811874
Butyrivibrio	119176	5078	0.0102217	0.0178989	1.75107	0
Alistipes	159682	7016	0.0136959	0.0247299	1.80564	0
Shigella	2171	109	0.000186206	0.000384202	2.06331	9.29e-11
Eubacterium	521554	31350	0.0447336	0.110502	2.47023	0
Bacteroides	939864	57032	0.080612	0.201026	2.49375	0
Aeropyrum	65	4	5.58e-06	1.41e-05	2.52898	0.627581
Parabacteroides	152446	9787	0.0130753	0.0344971	2.63835	0
Roseburia	345119	24468	0.0296008	0.0862445	2.91359	0
Escherichia	43607	3876	0.00374016	0.0136621	3.6528	0
Lawsonia	3613	491	0.000309886	0.00173067	5.58486	0
Uzinura	5	1	4.29e-07	3.52e-06	8.21918	0.183643
